# Supplementary material for: Decoration of silicon nanostructures with copper particles for simultaneous selective capture and mass spectrometry detection of His-tagged model peptide
Source: Royal Society of Chemistry journal article supplement (doi:10.1039/c4an01056f), 2014-07-17
Supplement: c4an01056f1.pdf [file c4an01056f1.pdf]

## Supplementary Information

### Decoration of silicon nanostructures with copper particles for simultaneous selective capture and mass spectrometry detection of His-tagged model peptide

Yannick Coffinier<sup>1,2\*</sup>, Ievgen Kurylo<sup>1,3</sup>, Hervé Drobecq<sup>4</sup>, Sabine Szunerits<sup>1</sup> Oleg Melnyk<sup>4</sup>,  
Vladimir N. Zaitsev<sup>3,5</sup> and Rabah Boukherroub<sup>1</sup>

<sup>1</sup> *Institut de Recherche Interdisciplinaire (IRI, CNRS-USR 3078), Université Lille1, Parc de la Haute Borne, 50 Avenue de Halley, BP 70478, 59658 Villeneuve d'Ascq, France.*

<sup>2</sup> *Institut d'Electronique, de Microélectronique et de Nanotechnologie (IEMN, UMR CNRS 8520), Université Lille1, Cité Scientifique, Avenue Poincaré, BP 60069, 59652 Villeneuve d'Ascq, France.*

<sup>3</sup> *Taras-Chevtchenko University of Kiev, Ukraine.*

<sup>4</sup> *Institut de Biologie de Lille (IBL, CNRS-UMR 8161), Université de Lille Nord de France, IFR142, 1 rue du Pr. Calmette, 59021 Lille, France.*

<sup>5</sup> *Chemistry department, Pontifical Catholic University of Rio de Janeiro, Rua Marquês de São Vicente, 225 Gavea, Rio de Janeiro, RJ Brazil.*

\* To whom correspondence should be addressed. E-mail: [yannick.coffinier@iri.univ-lille1.fr](mailto:yannick.coffinier@iri.univ-lille1.fr); Tel: +33 3 20 19 79 87; Fax: +33 3 20 19 78 84.

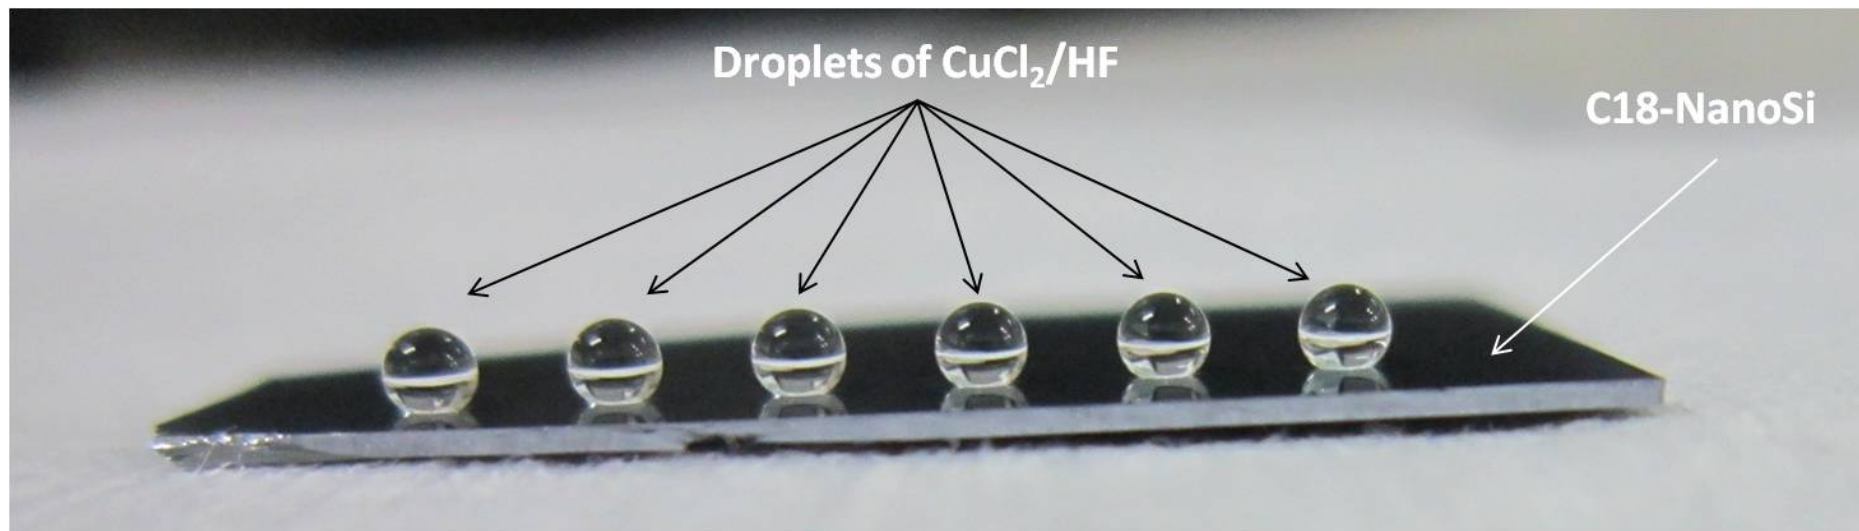

**Figure S1:** Picture of  $\text{CuCl}_2/\text{HF}$  droplets confined in superhydrophilic zones.

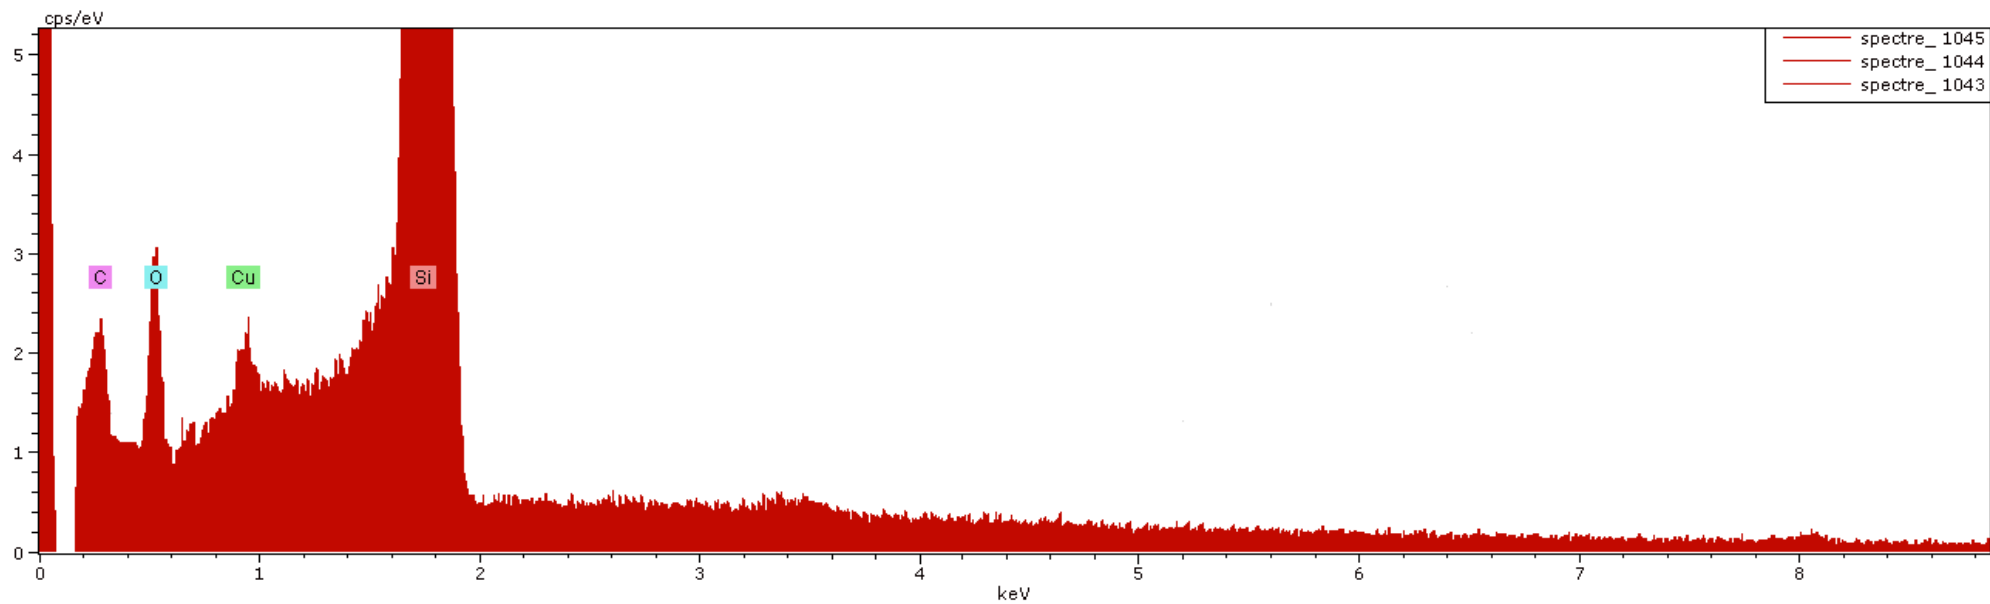

**Figure S2:** EDX analysis of silicon nanostructures decorated by Cu particles.

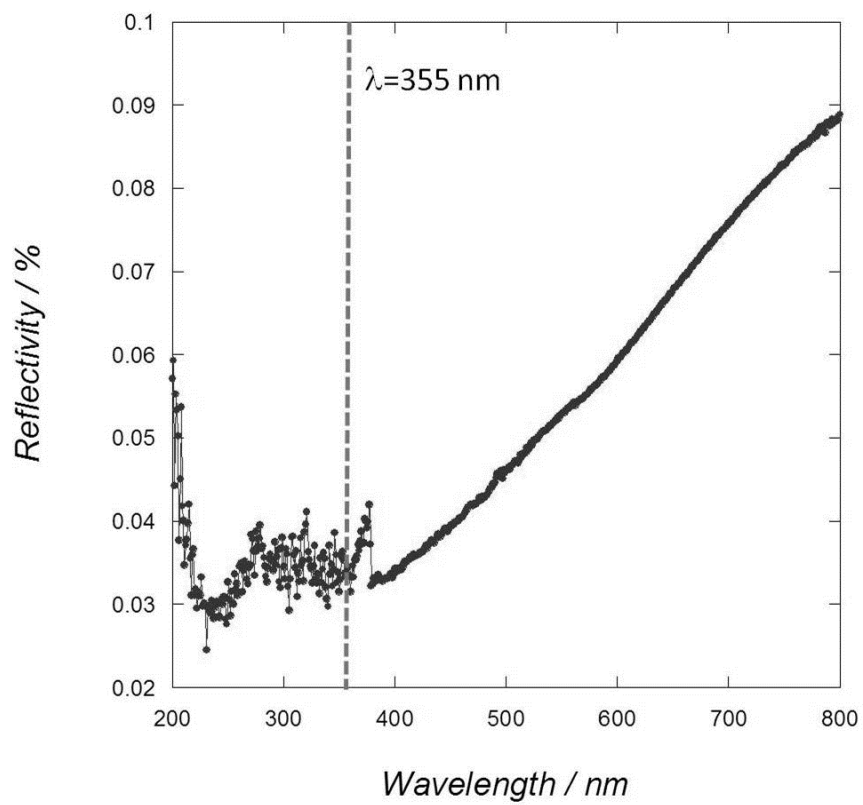

**Figure S3:** Reflectivity spectrum of the Cu-NanoSi surface.

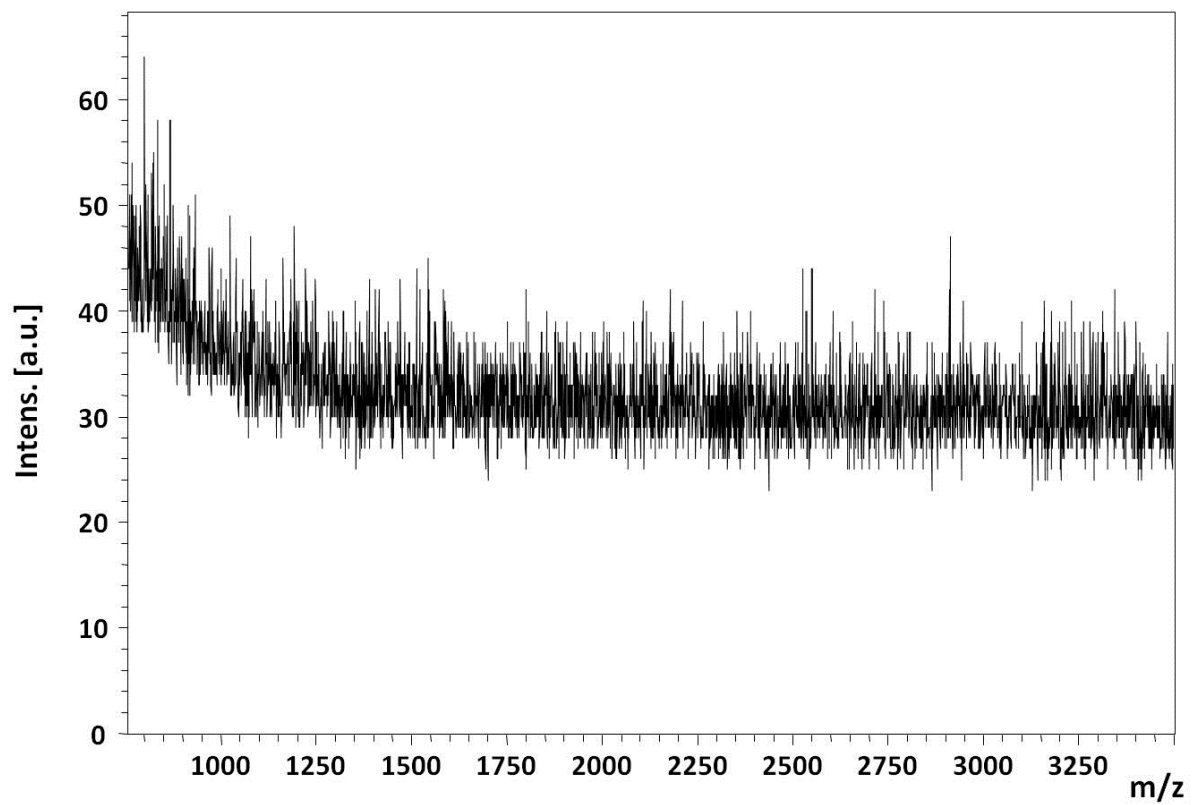

**Figure S4:** Mass spectra of His-DAB in FBS solution (20%) with imidazole (50 mM in PBS).
